# Supplementary material
Source: PubMed Central journal article supplement (PMC6460746)

**Figure S1**

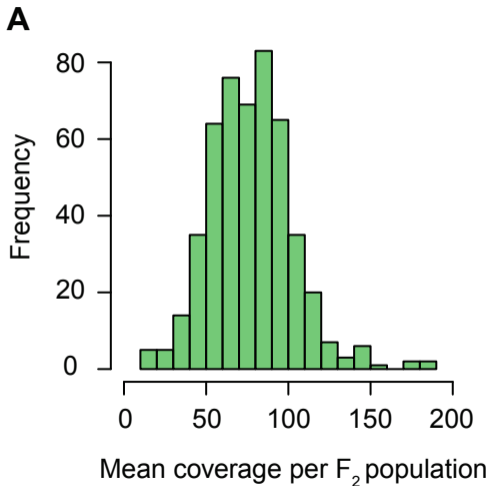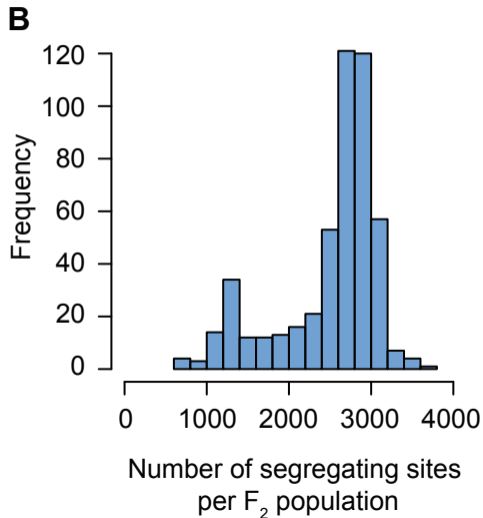

Supplement: 41437_2018_107_MOESM1_ESM.pdf [file 41437_2018_107_MOESM1_ESM.pdf]
