# Supplementary material
Source: PubMed Central journal article supplement (PMC6460746)

**Figure S2**

POP007: ICE49 x ICE153

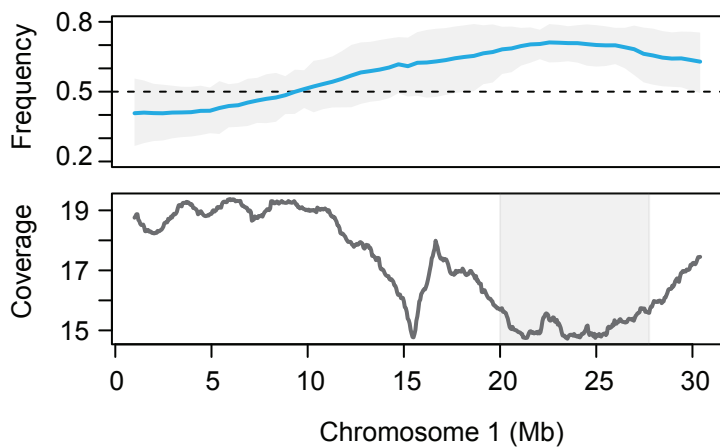

POP063: ICE169 x Bak-7

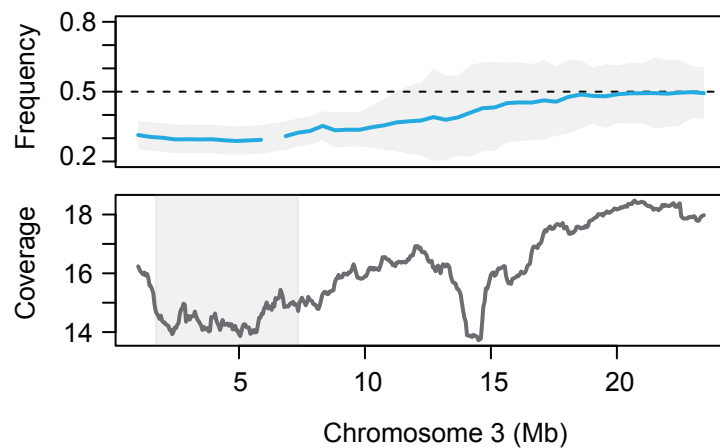

POP026: ICE63 x ICE216

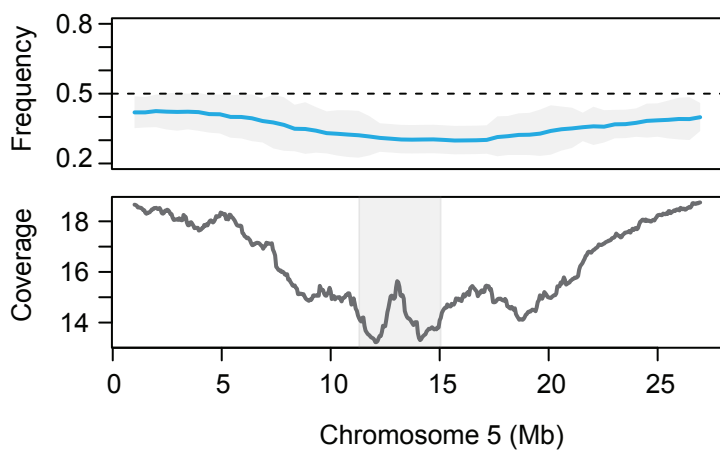

POP064: ICE169 x Cdm-0

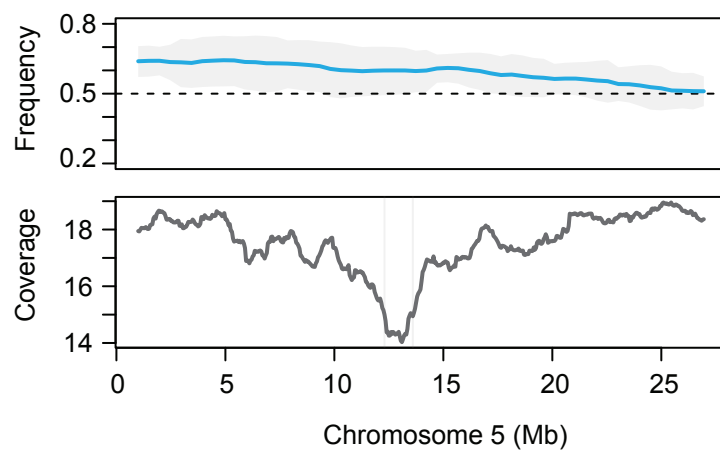

POP035: ICE63 x Vash-1

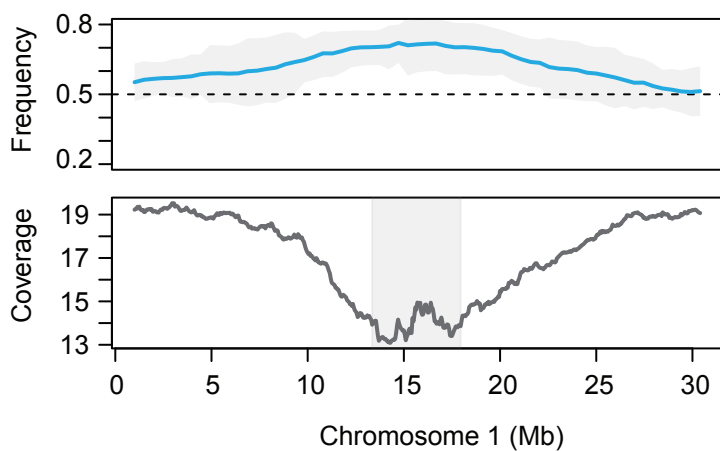

POP100: Ey15.2 x Leo-1

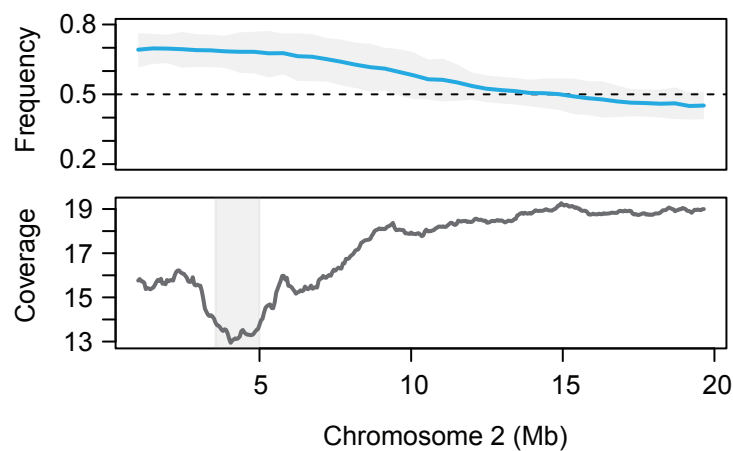

Supplement: 41437_2018_107_MOESM2_ESM.pdf [file 41437_2018_107_MOESM2_ESM.pdf]
