# Supplementary material
Source: PubMed Central journal article supplement (PMC6460746)

**Figure S3**

POP007

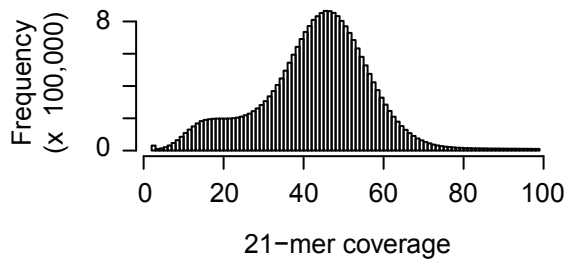

POP026

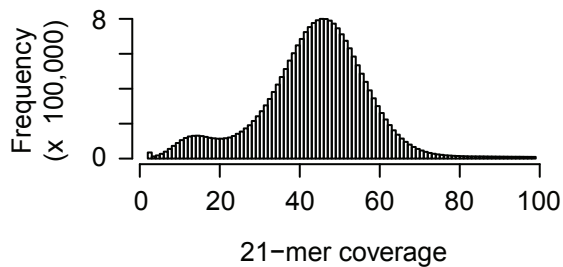

POP035

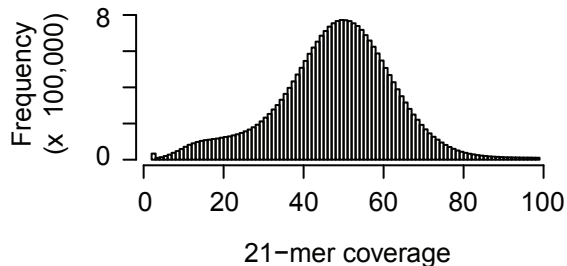

POP063

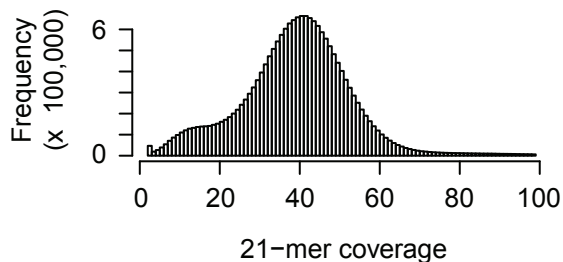

POP064

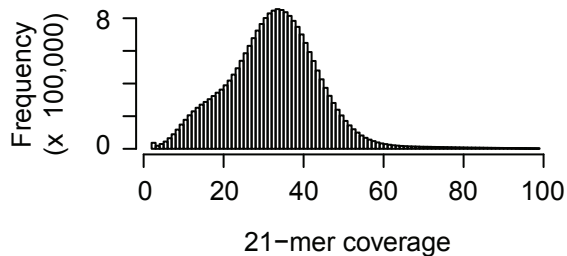

POP100

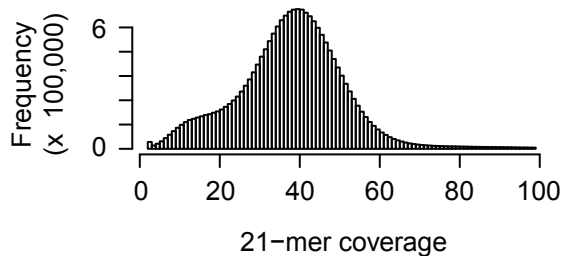

Supplement: 41437_2018_107_MOESM3_ESM.pdf [file 41437_2018_107_MOESM3_ESM.pdf]
