# Supplementary material
Source: PubMed Central journal article supplement (PMC6460746)

**Figure S4**

LöV-5 x Sha

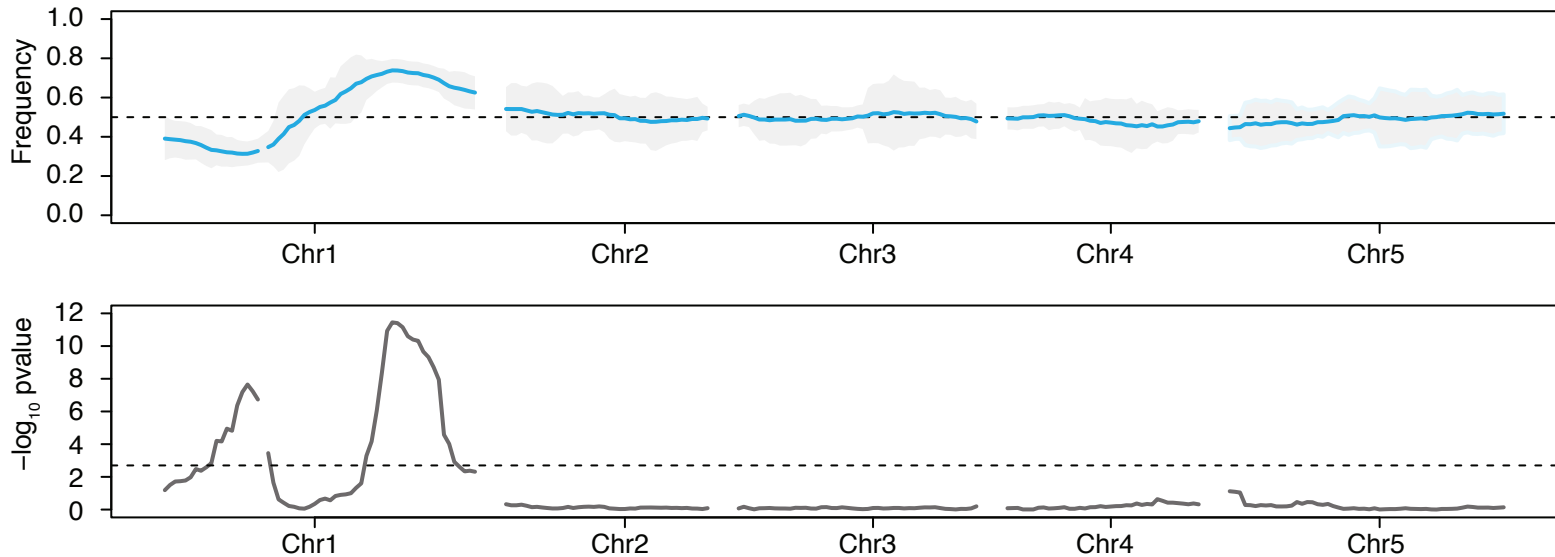

Supplement: 41437_2018_107_MOESM4_ESM.pdf [file 41437_2018_107_MOESM4_ESM.pdf]
