# Supplementary material
Source: PubMed Central journal article supplement (PMC6460746)

Figure S5

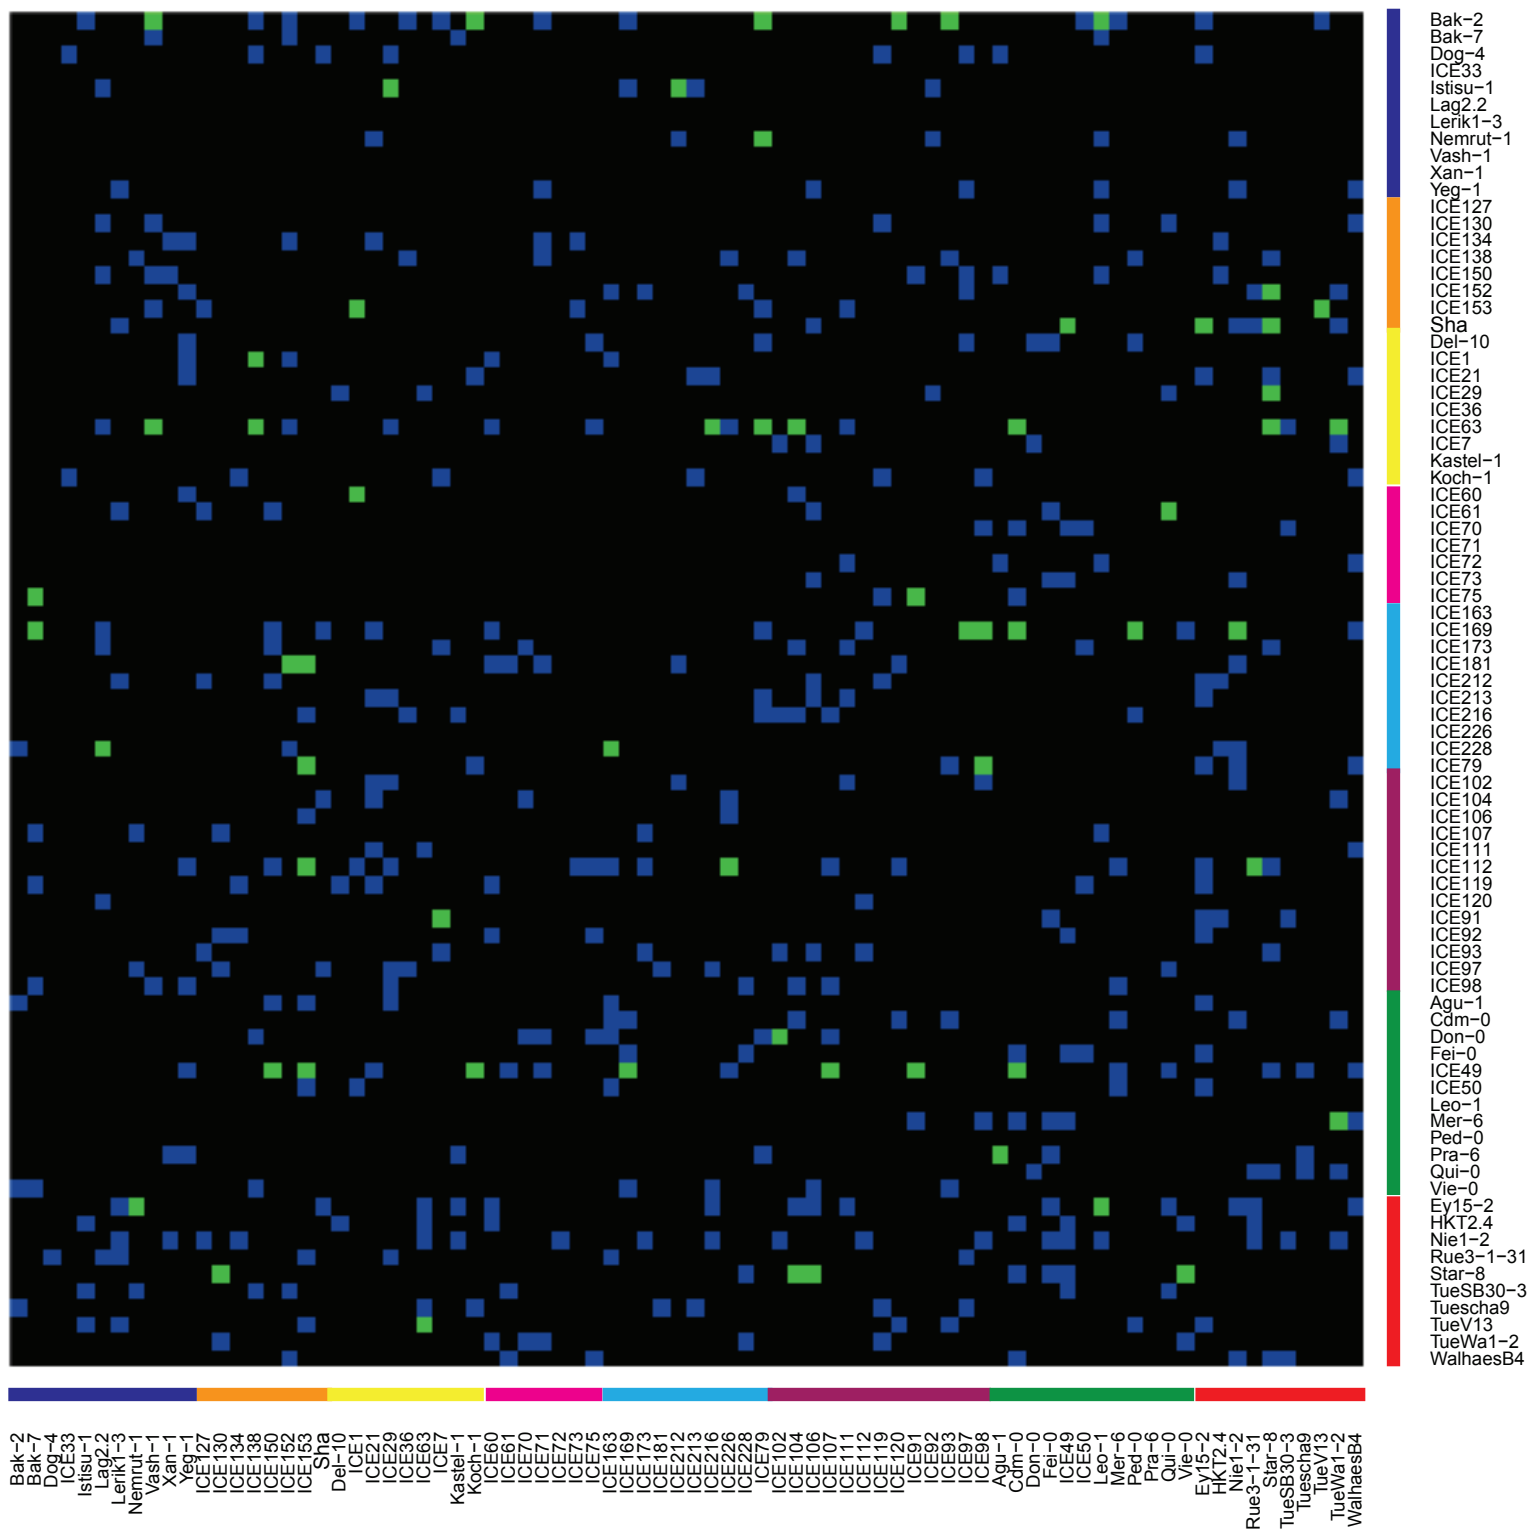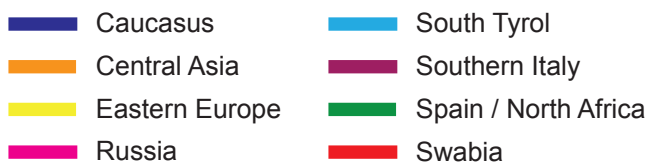

Supplement: 41437_2018_107_MOESM5_ESM.pdf [file 41437_2018_107_MOESM5_ESM.pdf]
