# Supplementary material
Source: PubMed Central journal article supplement (PMC6460746)

**Figure S6**

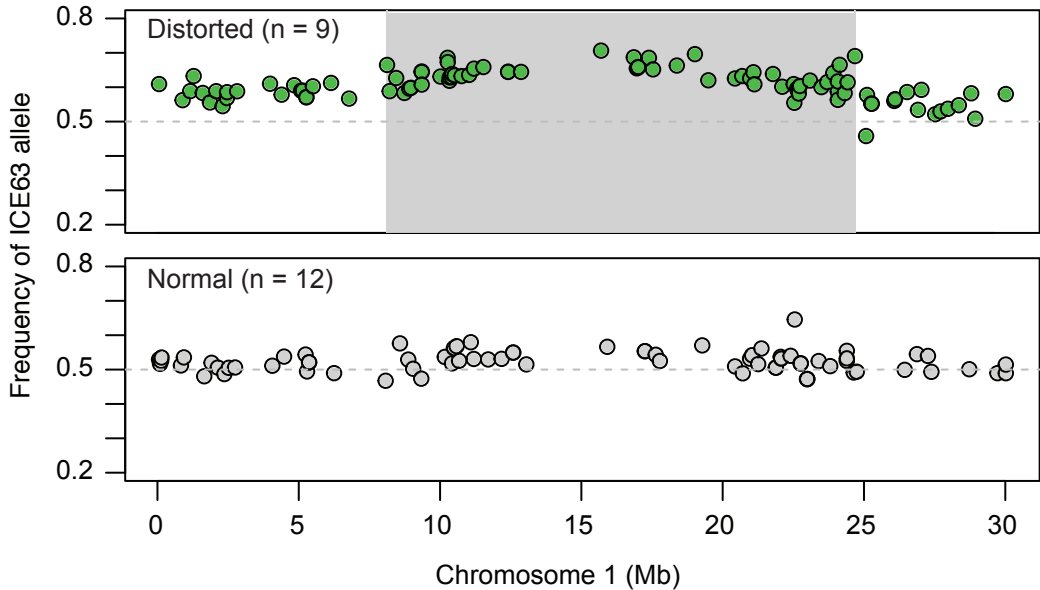

Supplement: 41437_2018_107_MOESM6_ESM.pdf [file 41437_2018_107_MOESM6_ESM.pdf]
